# Supplementary material
Source: publisher site journal article supplement (https://www.dovepress.com/get_supplementary_file.php?f=390409.docx)
Supplement: Supplementary file 1 [file get_supplementary_file.php]

Appendix 1 interview guide

1. What is your overall understanding of aplastic anemia?
2. What effect does aplastic anemia have on your life?
3. What is your overall understanding of your drug treatment?
4. What positive and negative impacts of drug treatment in your daily life?
5. What are your more common difficulties in relation to your treatment? How do you resolve it?
6. What is your biggest motivation to follow the prescription?
7. What kind of support have you received to follow your treatment?
8. Do you think you have good drug compliance? Why?
9. What do you think would help you to improve your drug compliance?
10. Are there any other aspects that have not been discussed or that you would like to expand upon?
